# Supplementary material
Source: MDPI journal article supplement (https://www.mdpi.com/2227-9717/9/12/2231)
Supplement: s1 [file s1 › processes-1473124-supplementary.pdf]

## Supplemental Tables

Cátia Santos, Joana Monte, Natália Vilaça, João Fonseca, Henrique Trindade, Isabel Cortez and Piebep Goufo. 2021. Evaluation of the potential of agro-industrial waste-based composts to control *Botrytis* gray mold and soilborne fungal diseases in lettuce. *Processes*.

**Table S1.** Mineral composition (dry weight basis) of composts made from chestnut peels and shells, coffee grounds, grape marc and olive leaves, which were tested in this study. Different letters in a column indicate significant differences among means ( $p < 0.05$ ; ANOVA/Tukey's test). Data were adapted from Santos, C.; Fonseca, J.; Aires, A.; Coutinho, J.; Trindade, H. Effect of different rates of spent coffee grounds (SCG) on composting process, gaseous emissions and quality of end-product. *Waste Manag.* **2017**, *59*, 37–47. <https://doi.org/10.1016/j.wasman.2016.10.020>; Santos, C.; Goufo, P.; Fonseca, J.; Pereira, J.L.S.; Ferreira, L.; Coutinho, J.; Trindade, H. Effect of lignocellulosic and phenolic compounds on ammonia, nitric oxide and greenhouse gas emissions during composting. *J. Clean. Prod.* **2018**, *171*, 548–556. <https://doi.org/10.1016/j.jclepro.2017.10.050>.

| Treatments              | P (g kg <sup>-1</sup> ) | Ca (g kg <sup>-1</sup> ) | Mg (g kg <sup>-1</sup> ) | Fe (mg kg <sup>-1</sup> ) | Cu (mg kg <sup>-1</sup> ) | Zn (mg kg <sup>-1</sup> ) | Mn (mg kg <sup>-1</sup> ) |
|-------------------------|-------------------------|--------------------------|--------------------------|---------------------------|---------------------------|---------------------------|---------------------------|
| CONTROL                 | 1.59 ± 0.32 b           | 9.86 ± 4.78 a            | 1.00 ± 0.15 c            | 250.6 ± 140.69 c          | 4.15 ± 1.14 c             | 5.92 ± 1.42 c             | 44.67 ± 2.87 c            |
| Chestnut peels + shells | 1.57 ± 0.73 b           | 8.13 ± 0.83 b            | 1.18 ± 0.31 bc           | 293.5 ± 88.77 c           | 6.44 ± 0.89 b             | 9.42 ± 3.37 b             | 48.92 ± 9.93 c            |
| Coffee grounds          | 2.33 ± 0.04 a           | 8.23 ± 0.09 b            | 2.38 ± 0.39 a            | 638.3 ± 47.73 a           | 7.85 ± 1.23 ab            | 10.57 ± 0.28 b            | 78.09 ± 13.52 b           |
| Grape marc              | 2.30 ± 0.25 a           | 8.30 ± 0.43 b            | 1.38 ± 0.08 b            | 266.9 ± 67.61 c           | 8.57 ± 1.05 a             | 16.67 ± 4.59 a            | 139.67 ± 10.51 a          |
| Olive leaves            | 1.81 ± 0.18 b           | 9.92 ± 2.07 a            | 1.26 ± 0.14 bc           | 539.1 ± 172.60 b          | 8.86 ± 0.59 a             | 15.92 ± 3.34 a            | 51.25 ± 4.19 bc           |

**Table S2.** Phenolic composition (dry weight basis) of composts made from chestnut peels and shells, coffee grounds, grape marc and olive leaves, which were tested in this study. Different letters in a column indicate significant differences among means ( $p < 0.05$ ; ANOVA/Tukey's test). Data were adapted from Santos, C.; Fonseca, J.; Aires, A.; Coutinho, J.; Trindade, H. Effect of different rates of spent coffee grounds (SCG) on composting process, gaseous emissions and quality of end-product. *Waste Manag.* **2017**, *59*, 37–47. <https://doi.org/10.1016/j.wasman.2016.10.020>; Santos, C.; Goufo, P.; Fonseca, J.; Pereira, J.L.S.; Ferreira, L.; Coutinho, J.; Trindade, H. Effect of lignocellulosic and phenolic compounds on ammonia, nitric oxide and greenhouse gas emissions during composting. *J. Clean. Prod.* **2018**, *171*, 548–556. <https://doi.org/10.1016/j.jclepro.2017.10.050>.

| Treatments              | Total phenolics (mg g <sup>-1</sup> ) | Gallic acid (mg g <sup>-1</sup> ) | Hemicellulose (g kg <sup>-1</sup> ) | Cellulose (g kg <sup>-1</sup> ) | Lignin (g kg <sup>-1</sup> ) | Lignocellulose (g kg <sup>-1</sup> ) | Lignin/holocellulose ratio |
|-------------------------|---------------------------------------|-----------------------------------|-------------------------------------|---------------------------------|------------------------------|--------------------------------------|----------------------------|
| CONTROL                 | 1.18 ± 0.08 a                         | 22.64 ± 0.92 a                    | 55.65 ± 6.98 b                      | 240.41 ± 3.73 a                 | 248.14 ± 2.08 bc             | 544.23 ± 5.66 b                      | 0.84 ± 0.01 b              |
| Chestnut peels + shells | 1.07 ± 0.10 a                         | 25.96 ± 1.87 a                    | 58.95 ± 15.90 b                     | 215.13 ± 17.56 ab               | 379.73 ± 18.48 a             | 653.80 ± 12.54 a                     | 1.40 ± 0.23 a              |
| Coffee grounds          | 0.89 ± 0.04 a                         | 28.02 ± 1.06 a                    | 115.54 ± 8.39 a                     | 75.80 ± 3.99 c                  | 205.95 ± 37.12 c             | 397.27 ± 33.44 d                     | 1.16 ± 0.52 ab             |
| Grape marc              | 1.02 ± 0.35 a                         | 30.41 ± 6.58 a                    | 108.92 ± 21.75 a                    | 184.69 ± 46.91 b                | 352.02 ± 37.18 a             | 654.45 ± 32.32 a                     | 1.27 ± 0.42 ab             |
| Olive leaves            | 0.15 ± 0.00 a                         | 30.02 ± 9.36 a                    | 108.87 ± 4.12 a                     | 86.02 ± 43.60 c                 | 285.95 ± 40.32 b             | 480.63 ± 13.08 c                     | 1.58 ± 0.61 a              |

**Table S3.** Physicochemical characteristics (dry weight basis) of composts made from chestnut peels and shells, coffee grounds, grape marc and olive leaves, which were tested in this study. Different letters in a column indicate significant differences among means ( $p < 0.05$ ; ANOVA/Tukey's test). Data were adapted from Table 1 of this manuscript, and from Santos, C.; Fonseca, J.; Aires, A.; Coutinho, J.; Trindade, H. Effect of different rates of spent coffee grounds (SCG) on composting process, gaseous emissions and quality of end-product. *Waste Manag.* **2017**, *59*, 37–47. <https://doi.org/10.1016/j.wasman.2016.10.020>; Santos, C.; Goufo, P.; Fonseca, J.; Pereira, J.L.S.; Ferreira, L.; Coutinho, J.; Trindade, H. Effect of lignocellulosic and phenolic compounds on ammonia, nitric oxide and greenhouse gas emissions during composting. *J. Clean. Prod.* **2018**, *171*, 548–556. <https://doi.org/10.1016/j.jclepro.2017.10.050>.

| Treatments              | Soluble organic carbon (g C kg <sup>-1</sup> ) | Soluble organic nitrogen (g N kg <sup>-1</sup> ) | Ammonium NH <sub>4</sub> <sup>+</sup> -N (mg N kg <sup>-1</sup> ) | Nitrate NO <sub>3</sub> <sup>-</sup> (mg N kg <sup>-1</sup> ) | Total organic matter (g C kg <sup>-1</sup> ) | Total organic carbon (g C kg <sup>-1</sup> ) | Total nitrogen (g N kg <sup>-1</sup> ) | C/N            | pH             | Electrical conductivity (dS m <sup>-1</sup> ; water 1:5) |
|-------------------------|------------------------------------------------|--------------------------------------------------|-------------------------------------------------------------------|---------------------------------------------------------------|----------------------------------------------|----------------------------------------------|----------------------------------------|----------------|----------------|----------------------------------------------------------|
| CONTROL                 | 8.89 ± 1.84 cd                                 | 4.84 ± 2.00 a                                    | 693.40 ± 16.79 a                                                  | 0.18 ± 0.06 b                                                 | 938.02 ± 24.21 a                             | 489.61 ± 8.42 b                              | 23.80 ± 0.53 c                         | 20.57 ± 0.54 b | 8.11 ± 0.48 b  | 1.79 ± 0.07 a                                            |
| Chestnut peels + shells | 6.06 ± 1.40 d                                  | 4.21 ± 0.92 a                                    | 686.04 ± 29.51 a                                                  | 0.44 ± 0.10 b                                                 | 959.37 ± 4.72 a                              | 537.07 ± 3.51 a                              | 22.14 ± 0.63 c                         | 24.25 ± 0.54 a | 9.43 ± 0.30 ab | 1.43 ± 0.19 ab                                           |
| Coffee grounds          | 5.48 ± 0.24 d                                  | 2.84 ± 0.25 b                                    | 281.65 ± 18.94 c                                                  | 0.52 ± 0.12 b                                                 | 927.10 ± 19.69 a                             | 495.41 ± 4.87 b                              | 57.01 ± 4.87 a                         | 8.68 ± 0.15 c  | 7.05 ± 0.05 c  | 0.78 ± 0.07 c                                            |
| Grape marc              | 19.65 ± 3.67 a                                 | 5.69 ± 1.25 a                                    | 378.44 ± 15.17 b                                                  | 4.88 ± 1.03 a                                                 | 946.65 ± 4.84 a                              | 523.08 ± 2.62 ab                             | 26.52 ± 2.59 b                         | 19.72 ± 2.59 b | 9.01 ± 0.02 b  | 1.28 ± 0.13 b                                            |
| Olive leaves            | 12.70 ± 1.20 bc                                | 4.21 ± 1.02 a                                    | 280.06 ± 12.71 c                                                  | 0.20 ± 0.09 b                                                 | 948.23 ± 6.80 a                              | 533.26 ± 0.77 ab                             | 24.46 ± 1.64 bc                        | 21.80 ± 1.52 a | 9.53 ± 0.14 a  | 1.23 ± 0.12 b                                            |

**Table S4.** Lettuce head yield (g plant<sup>-1</sup>), disease severity and disease incidence of gray mold and Fusarium wilt in lettuce plants grown on soil/compost mixes inoculated with *B. cinerea* and *F. oxysporum*. The composts were incorporated into soils at proportions of 5% and 10% (weight basis). Control treatments consisted of non-amended soils. Disease incidence (%) = (total number of infected plants / total number of examined plants) \* 100. A semi-quantitative scale from 1 to 4 was used to rate the severity of the disease, where: 1 = no symptoms; 2 = leaf yellowing; 3 = stem wilting; and 4 = plant dead. Different letters in a column indicate significant differences among means ( $p < 0.05$ ; ANOVA/Tukey's test). Data were adapted from Figures 2, 3 and 4, and Table 2 of this manuscript.

| Treatments              | Whole lettuce yield on 5% compost in presence of <i>B. cinerea</i> | Whole lettuce yield on 10% compost in presence of <i>B. cinerea</i> | Whole lettuce yield on 5% compost in presence of <i>F. oxysporum</i> | Whole lettuce yield on 5% compost in presence of <i>F. oxysporum</i> | Disease incidence of gray mold on 5% compost | Disease incidence of gray mold on 10% compost | Disease incidence of Fusarium wilt on 5% compost | Disease incidence of Fusarium wilt on 10% compost | Disease severity of gray mold on 5% compost | Disease severity of gray mold on 10% compost | Disease severity of Fusarium wilt on 5% compost | Disease severity of Fusarium wilt on 10% compost |
|-------------------------|--------------------------------------------------------------------|---------------------------------------------------------------------|----------------------------------------------------------------------|----------------------------------------------------------------------|----------------------------------------------|-----------------------------------------------|--------------------------------------------------|---------------------------------------------------|---------------------------------------------|----------------------------------------------|-------------------------------------------------|--------------------------------------------------|
| CONTROL                 | 2.54 ± 0.63 c                                                      | 2.54 ± 0.63 c                                                       | 1.78 ± 1.07 d                                                        | 1.78 ± 1.07 d                                                        | 82.36 ± 2.10 a                               | 82.36 ± 2.10 a                                | 0.00 ± 0.00 c                                    | 0.00 ± 0.00 b                                     | 3.17 ± 0.47 a                               | 3.17 ± 0.47 a                                | 1.00 ± 0.00 b                                   | 1.00 ± 0.00 b                                    |
| Chestnut peels + shells | 9.54 ± 1.07 a                                                      | 11.77 ± 1.03 a                                                      | 9.88 ± 1.51 a                                                        | 9.57 ± 1.44 a                                                        | 0.00 ± 0.00 c                                | 0.00 ± 0.00 c                                 | 0.00 ± 0.00 c                                    | 0.00 ± 0.00 b                                     | 1.14 ± 0.02 b                               | 1.07 ± 0.05 c                                | 1.02 ± 0.06 b                                   | 1.07 ± 0.05 b                                    |
| Coffee grounds          | 2.62 ± 0.12 c                                                      | 3.20 ± 0.09 c                                                       | 2.87 ± 0.03 c                                                        | 4.77 ± 0.17 c                                                        | 48.82 ± 7.13 b                               | 26.44 ± 8.11 b                                | 55.62 ± 9.79 b                                   | 0.00 ± 0.00 b                                     | 2.99 ± 0.50 a                               | 2.43 ± 0.59 b                                | 2.76 ± 0.61 a                                   | 1.15 ± 0.11 b                                    |
| Grape marc              | 6.57 ± 0.82 b                                                      | 7.32 ± 0.60 b                                                       | 4.88 ± 0.90 b                                                        | 7.57 ± 0.28 b                                                        | 50.02 ± 6.92 b                               | 75.15 ± 6.21 a                                | 96.10 ± 5.31 a                                   | 39.28 ± 1.57 a                                    | 3.77 ± 0.21 a                               | 3.56 ± 0.44 a                                | 3.15 ± 0.80 a                                   | 2.63 ± 0.50 a                                    |
| Olive leaves            | 9.76 ± 0.76 a                                                      | 12.63 ± 1.31 a                                                      | 10.33 ± 1.56 a                                                       | 9.74 ± 1.53 a                                                        | 0.00 ± 0.00 c                                | 0.00 ± 0.00 c                                 | 0.00 ± 0.00 c                                    | 0.00 ± 0.00 b                                     | 1.03 ± 0.03 b                               | 1.00 ± 0.00 c                                | 1.00 ± 0.02 b                                   | 1.06 ± 0.04 b                                    |
